# Supplementary material
Source: PubMed Central journal article supplement (PMC2911312)
Supplement: supp_M110.126557_jbc.M110.126557-1.pdf [file supp_M110.126557_jbc.M110.126557-1.pdf]

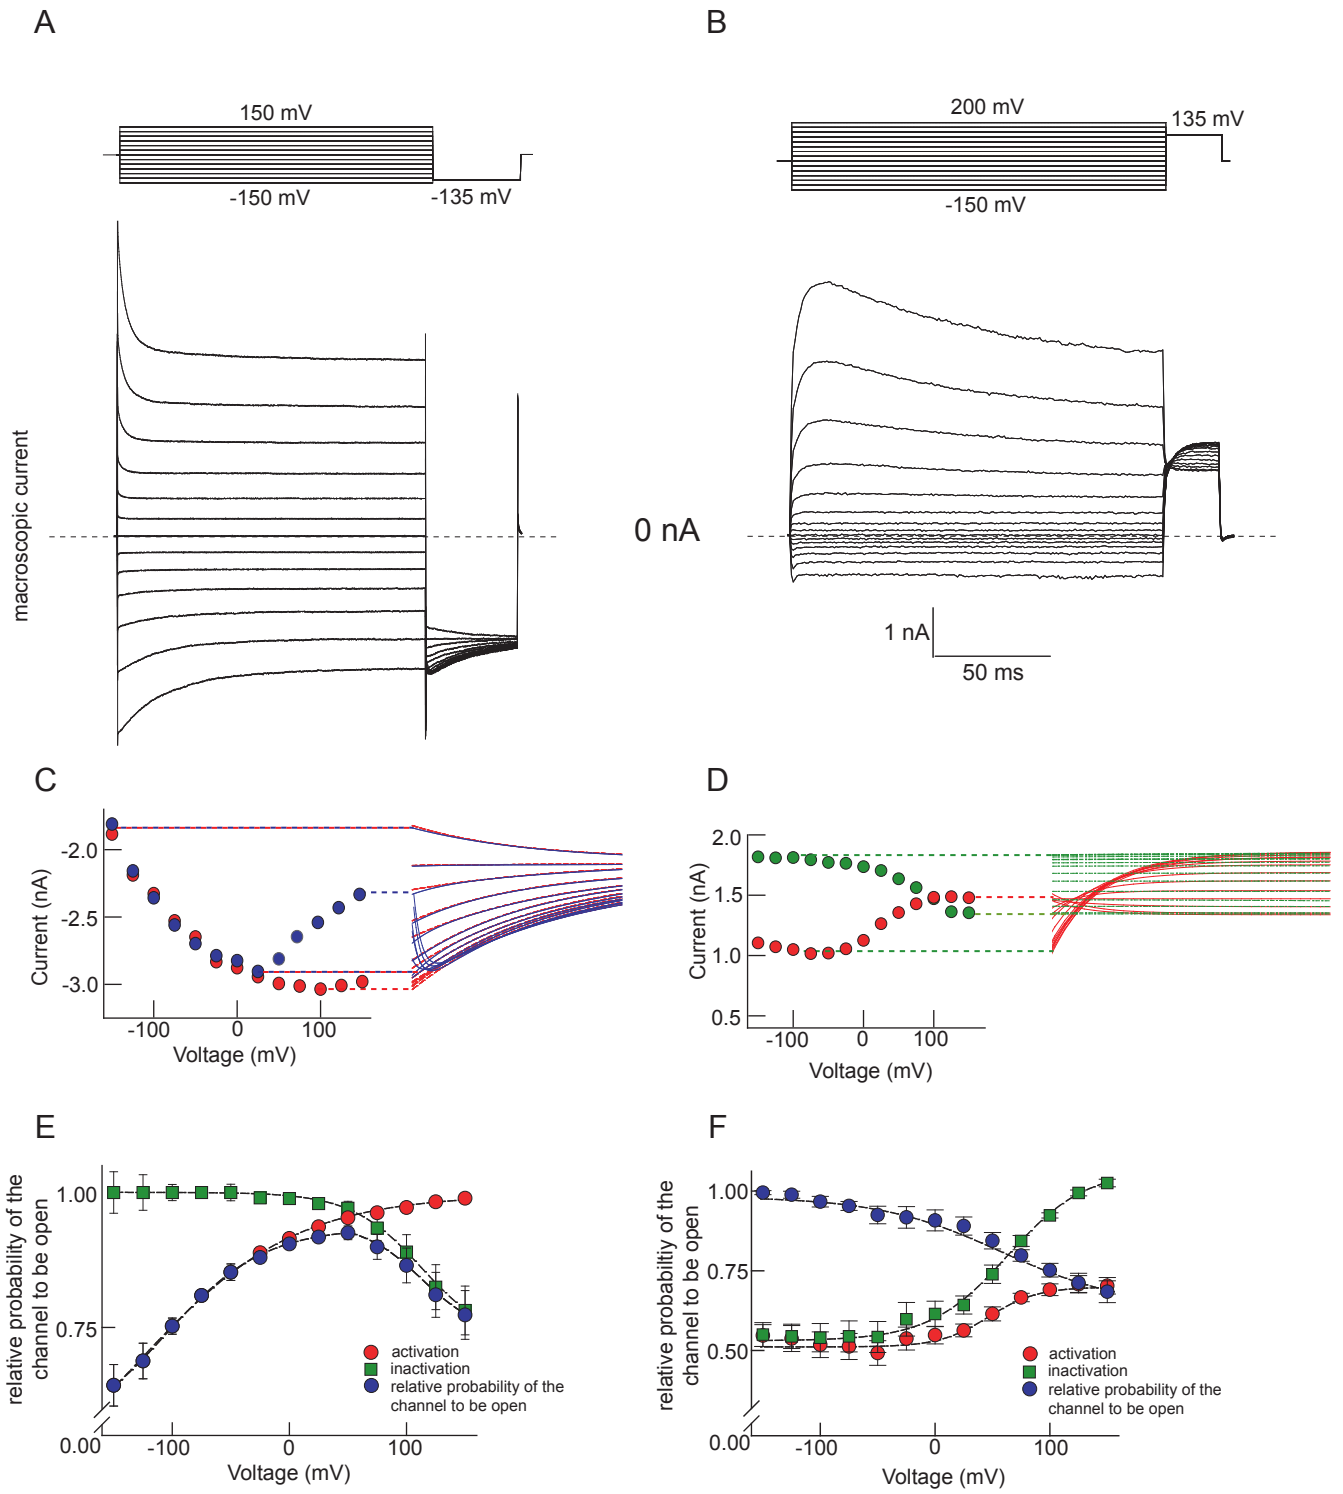

Supplementary Fig. S1: Kovermann et al

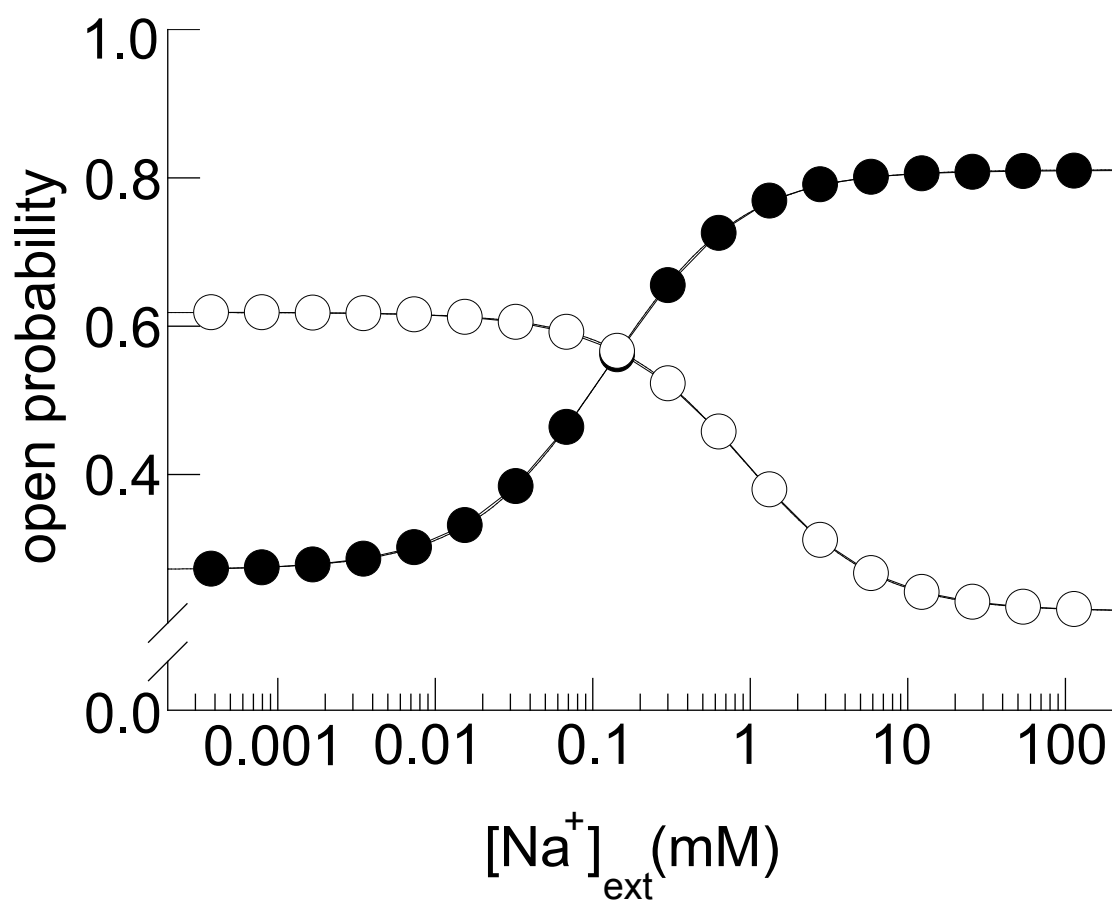

● WT (-120 mV, 5 mM L-Glu)

○ D117A (-120 mV, 5 mM L-Glu)

A

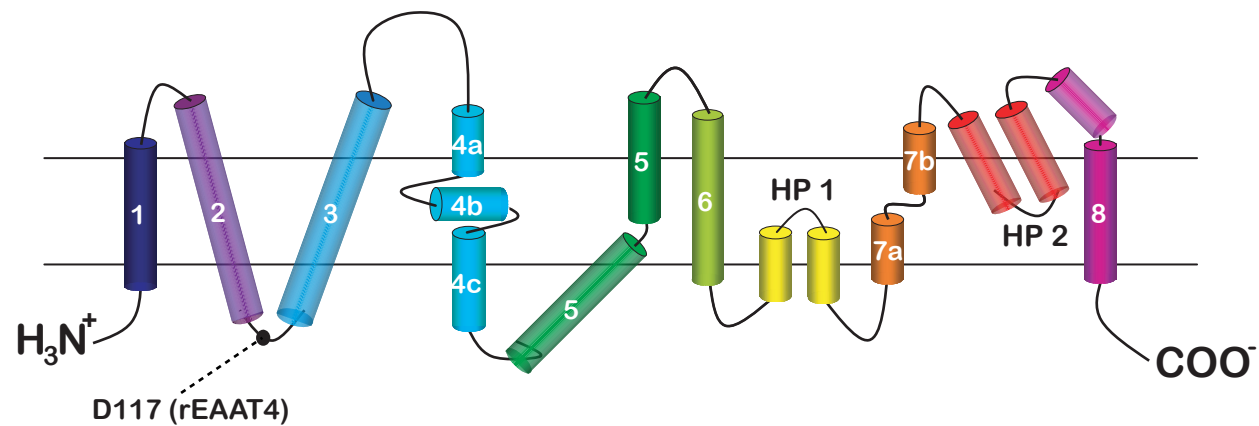

|               | TM 2                          | Aa  |
|---------------|-------------------------------|-----|
| <i>hEAAT1</i> | ..RMLQMLVLPLIISSLVTGMAAIDSK.. | 114 |
| <i>hEAAT2</i> | ..RMLKMLILPLIISSLITGLSGLDAK.. | 111 |
| <i>hEAAT3</i> | ..RMLKLIILPLIISSMITGVAALDSN.. | 85  |
| <i>rEAAT4</i> | ..RMLQMLVLPLIVSSLVTGMASIDNK.. | 119 |
| <i>hEAAT5</i> | ..RMLKMMILPLVFSLSMSGLASIDAK.. | 83  |
| <i>Gl tPh</i> | ..RLKMLVMPIVFASLVVGAASISPA..  | 75  |

B

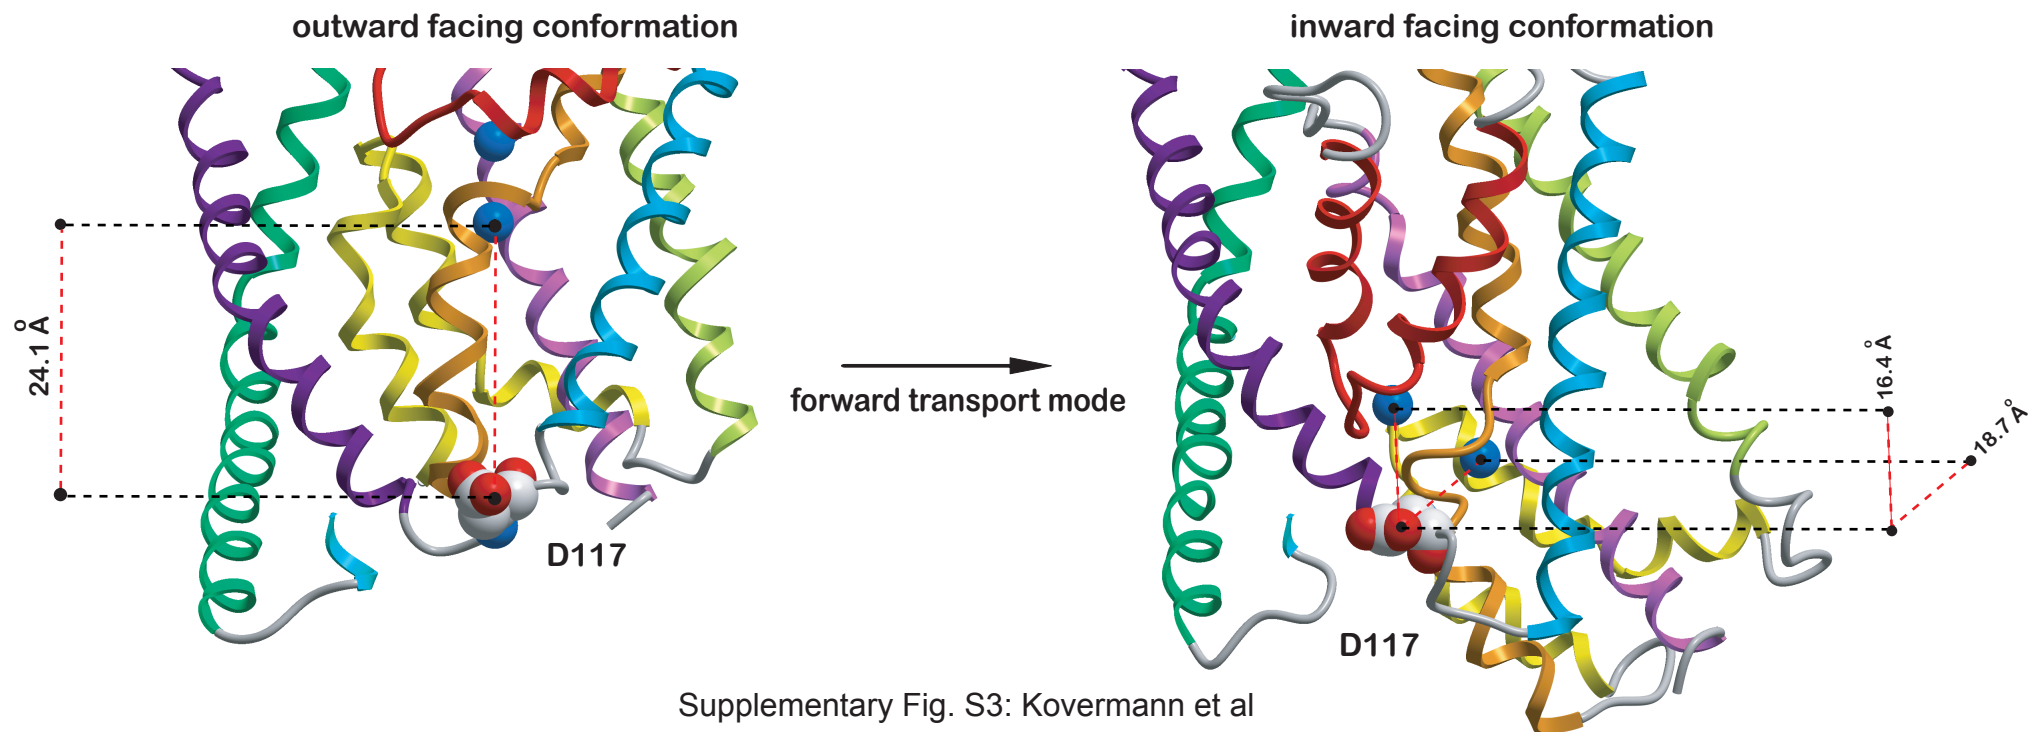

Supplementary Fig. S3: Kovermann et al

A

Table S1A: rate constants for model 1 and 2 (Fig. 7A-D)

|    | <i>forward</i>                                     | <i>backward</i>                                 | $z\delta$ | <i>asymmetry</i> |
|----|----------------------------------------------------|-------------------------------------------------|-----------|------------------|
| 1  | $1.0 \times 10^4 \text{ M}^{-1} \text{ s}^{-1}$    | $1.0 \times 10^2 \text{ s}^{-1}$                | 0.46      | 0.1              |
| 2  | $1.0 \times 10^4 \text{ M}^{-1} \text{ s}^{-1}$    | $5.0 \times 10^2 \text{ s}^{-1}$                |           |                  |
| 3  | $6.0 \times 10^6 \text{ M}^{-1} \text{ s}^{-1}$    | $5.0 \times 10^2 \text{ s}^{-1}$                |           |                  |
| 4  | $6.0 \times 10^{11} \text{ M}^{-1} \text{ s}^{-1}$ | $7.0 \times 10^2 \text{ s}^{-1}$                |           |                  |
| 5  | $6.0 \times 10^{11} \text{ M}^{-1} \text{ s}^{-1}$ | $7.0 \times 10^2 \text{ s}^{-1}$                |           |                  |
| 6  | $6.0 \times 10^6 \text{ M}^{-1} \text{ s}^{-1}$    | $5.0 \times 10^2 \text{ s}^{-1}$                |           |                  |
| 7  | $1.0 \times 10^4 \text{ M}^{-1} \text{ s}^{-1}$    | $1.0 \times 10^3 \text{ s}^{-1}$                | 0.55      | 0.5              |
| 8  | $2.0 \times 10^3 \text{ M}^{-1} \text{ s}^{-1}$    | $1.9 \times 10^3 \text{ s}^{-1}$                |           |                  |
| 9  | $1.0 \times 10^3 \text{ s}^{-1}$                   | $4.0 \times 10^4 \text{ M}^{-1} \text{ s}^{-1}$ | 0.40      | 0.5              |
| 10 | $3.0 \times 10^3 \text{ s}^{-1}$                   | $9.0 \times 10^4 \text{ M}^{-1} \text{ s}^{-1}$ |           |                  |
| 11 | $3.0 \times 10^3 \text{ s}^{-1}$                   | $1.0 \times 10^5 \text{ M}^{-1} \text{ s}^{-1}$ |           |                  |
| 12 | $1.0 \times 10^5 \text{ s}^{-1}$                   | $2.0 \times 10^7 \text{ M}^{-1} \text{ s}^{-1}$ |           |                  |
| 13 | $1.0 \times 10^5 \text{ s}^{-1}$                   | $1.0 \times 10^8 \text{ M}^{-1} \text{ s}^{-1}$ |           |                  |
| 14 | $1.0 \times 10^6 \text{ M}^{-1} \text{ s}^{-1}$    | $1.0 \times 10^3 \text{ s}^{-1}$                |           |                  |
| 15 | $4.0 \times 10^4 \text{ s}^{-1}$                   | $1.0 \times 10^3 \text{ s}^{-1}$                | 0.59      | 0.9              |
| 16 | $2.0 \times 10^4 \text{ s}^{-1}$                   | $1.0 \times 10^6 \text{ M}^{-1} \text{ s}^{-1}$ |           |                  |
| 17 | $1.4 \times 10^1 \text{ s}^{-1}$                   | $1.0 \times 10^3 \text{ s}^{-1}$                | 0.05      | 0.5              |

B

Table S1B: open probabilities for model 1 and 2 (Fig. 7A-D)

|    | <i>model 1</i> |              | <i>model 2</i> |              |
|----|----------------|--------------|----------------|--------------|
|    | <i>WT</i>      | <i>D117A</i> | <i>WT</i>      | <i>D117A</i> |
| p1 | 0.65           | 0.005        | 0.55           | 0.03         |
| p2 | 0.24           | 0.77         | 0.80           | 0.79         |
| p3 | 0.96           | 1.00         | 0.16           | 0.22         |
| p4 | 0.05           | 0.49         | 0.26           | 0.30         |
| p5 | 0.15           | 0.75         | 0.13           | 0.66         |
| p6 | 1.00           | 0.01         | 1.00           | 0.002        |
| p7 | 0.19           | 0.23         | 0.66           | 0.23         |
| p8 | <i>n. d.</i>   | <i>n. d.</i> | <i>n. d.</i>   | <i>n. d.</i> |

**FIGURE S1. Separation of two gating processes with distinct voltage dependence in WT and mutant D117A EAAT4 anion channels.** *A, B*, gate separation in WT (*A*) and D117A EAAT4 (*B*). Tail currents at -135 mV (WT) or +135 mV (D117A) were fit with mono- or biexponential function to determine instantaneous (WT) or late (D117A) current amplitudes. *C, D*, plot of instantaneous and late current amplitudes for WT (*C*) and D117A (*D*) EAAT4. *E, F*, voltage dependence of relative open probabilities as well as of channel activation and inactivation for WT (*E*) and D117A (*F*) EAAT4.

**FIGURE S2. Modified channel open probabilities in D117A explain the experimentally observed alterations of Na<sup>+</sup> dependences.** Simulated sodium dependences for WT and D117A EAAT4 anion currents at -120 mV using model 2 shown in Fig. 7C.

**FIGURE S3. Distances between D117A and Na<sup>+</sup>-binding sites estimated from homology modeling of EAAT4.** *A*, position of D117 in the predicted topology model of EAAT4 based on (9) and alignment of amino acid sequences homologous to AA 95 and 119 in *rEAAT4*. *B*, tertiary structure of *rEAAT4* as homology modeled to *Glt<sub>ph</sub>* high resolution structures with PDB IDs 2NWX (outward facing conformation) and 3KBC (inward facing conformation). Colors of TMs are according to *A*, TM1 and TM4 were removed for clarity. Interhelical loops are in grey. D117 and bound Na<sup>+</sup> are depicted as space-filling models.

**TABLE S1. Rate constants and open probabilities used in the kinetic modeling of WT EAAT4 and D117A EAAT4.** *A*, rate constants and fit parameter for  $z\delta$  and for asymmetries applied to model 1 and 2. Electrogenic reactions are defined by  $z\delta$  values, which give the effective charge movement across the membrane and asymmetry values referring to the different voltage dependence of the forward and the backward reaction. *B*, Simulated open probabilities for model 1 and 2.
